# Supplementary material
Source: PubMed Central journal article supplement (PMC10198433)
Supplement: NIHMS1885700-supplement-Supplement2.pdf [file NIHMS1885700-supplement-Supplement2.pdf]

1 **Demonstrating the Use of Non-targeted Analysis for Identification of Unknown Chemicals**  
2 **in Rapid Response Scenarios**

3 **Supporting Information**

4 John T. Sloop <sup>a,b</sup>, Alex Chao <sup>a</sup>, Jennifer Gundersen <sup>c</sup>, Allison L. Phillips <sup>d</sup>, Jon R. Sobus <sup>a</sup>, Elin  
5 M. Ulrich <sup>a</sup>, Antony J. Williams <sup>a</sup>, Seth R. Newton <sup>a\*</sup>

6 <sup>a</sup> U.S. Environmental Protection Agency, Office of Research and Development, Center for  
7 Computational Toxicology and Exposure, Research Triangle Park, North Carolina 27709, United  
8 States

9 <sup>b</sup> Oak Ridge Institute for Science and Education (ORISE) Participant, Research Triangle Park,  
10 North Carolina 27709, United States

11 <sup>c</sup> U.S. Environmental Protection Agency, Office of Research and Development, Center for  
12 Environmental Measurement and Modeling, Narragansett, Rhode Island 02882, United States

13 <sup>d</sup> U.S. Environmental Protection Agency, Office of Research and Development, Center for  
14 Public Health and Environmental Assessment, Research Triangle Park, North Carolina 27709,  
15 United States

16 \*Corresponding author; Email address: Newton.Seth@epa.gov

17

18 Number of pages: 35; Figures: Figure S1-S4; Tables: Table S1, S4-S8, and S15

19

## 20 1. Materials

21 Ethanol (ACS spectrophotometric grade) was purchased from Sigma Aldrich (St. Louis,  
22 MO, USA). Formic acid was purchased from Fisher Scientific (Hampton, NH, USA). Acetonitrile  
23 and methanol (B&J Brand High Purity Solvent) were purchased from Honeywell Burdick &  
24 Jackson (Muskegon, MI, USA). Isotopically labeled standards of d<sub>3</sub>-thiamethoxam  
25 ([DTXSID60746816](#)) and d<sub>4</sub>-pyriproxyfen ([DTXSID20894089](#)) were purchased from CDN  
26 Isotopes, Inc. (Pointe-Claire, Quebec, Canada). Isotopically labeled standards of <sup>13</sup>C<sub>4</sub>-  
27 perfluorooctanoic acid (MPFOA, [DTXSID70892999](#)) and <sup>13</sup>C<sub>4</sub>-perfluorooctanesulfonate  
28 (MPFOS, [DTXSID80894101](#)) were purchased from Wellington Laboratories, Inc. (Guelph,  
29 Ontario, Canada). Isotopically labeled standards of <sup>13</sup>C<sub>3</sub>-atrazine ([DTXSID60894088](#)), <sup>13</sup>C<sub>6</sub>-  
30 methyl paraben ([DTXSID30894090](#)), and <sup>13</sup>C<sub>4</sub>, <sup>15</sup>N<sub>2</sub>-fipronil sulfone ([DTXSID10894093](#)) were  
31 purchased from Cambridge Isotope Laboratories, Inc. (Tewksbury, MA, USA).

32 A standard of finasteride ([DTXSID3020625](#)) and malathion ([DTXSID4020791](#)) were  
33 purchased from Sigma Aldrich (St. Louis, MO, USA). A standard of  $\alpha$ -hydroxy alprazolam  
34 ([DTXSID60190613](#)) was purchased from Cayman Chemical Company (Ann Arbor, MI, USA). A  
35 commercially available aqueous film forming foam (AFFF) mixture, Solberg Type 6, was selected  
36 from the Department of Defense Qualified Products List of aqueous film forming foams and  
37 purchased commercially by the National Institute of Environmental Health Science (NIEHS), and  
38 a subaliquot was obtained.<sup>1</sup> The carpet squares used in mock scenario 3 were free swatches  
39 obtained from a local home improvement store. Ultrapure deionized (DI) water was generated in-  
40 house from a Barnsted Easypure Ultraviolet and Ultrafilter (UV/UF) system (Dubuque, IA, USA),  
41 coupled with activated charcoal and ion exchange resin canisters.

42

## 43 2. Quality Control

44 Mass calibration of the instrument was performed according to vendor recommendations prior  
45 to analysis in each polarity for each of the mock scenarios. Any drift in the mass accuracy of the  
46 time-of-flight (TOF) was continuously corrected for by infusion of two reference compounds,  
47 purine ([DTXSID5074470](#), monoisotopic mass = 120.0436) and Hexakis(1H,1H,3H-  
48 perfluoropropoxy)phosphazene ([DTXSID90880494](#), monoisotopic mass = 921.0025), via dual-  
49 electrospray ionization (ESI) sprayer. Mass accuracy of tracer compounds spiked into each sample  
50 and blank were monitored during each mock scenario, and if at any point mass accuracy was > 5  
51 ppm for more than one of the tracer compounds per ionization mode, analysis was paused, and a  
52 thorough cleaning of the instrument would take place. Tracer performance is shown in Table S6.  
53 Matrix blanks were prepared by performing the appropriate sample preparation (dilution or  
54 extraction) on an un-spiked sample of the same matrix as the spiked sample(s) for each mock  
55 scenario. Matrix blanks were run for each mock scenario in order to perform blank subtraction of  
56 sample spectra and instrumental response. Spectrum blank subtraction was performed by  
57 subtracting the blank spectrum from the sample spectrum via Agilent's Qualitative Analysis and  
58 by subtracting the blank measured signal from the sample measured signal for a feature of interest  
59 using data output from the WebApp.

60

## 61 3. Sample Selection and Preparation

62 The work presented here attempted to mimic situations where targeted rapid response  
63 methods had failed to identify a chemical, and thus NTA would be employed as a logical next step.  
64 Selected Analytical Methods for Environmental Remediation and Recovery (SAM) are made

65 available to labs that aid in rapid response with the EPA.<sup>2</sup> Targeted methods for analysis of specific  
66 chemicals can be searched via the SAM Chemical Methods Query.<sup>3,4</sup> The specific chemicals that  
67 the mock scenarios were intended to mimic, the surrogates used in place of those, and the  
68 chemicals assigned a structure in mock scenario 3 were searched against the list of  
69 chemicals/methods in SAM. While other methods may exist and be at the disposal of rapid  
70 response laboratories, one of the primary documents for chemicals routinely targeted did not  
71 contain any of the chemicals identified in any of the mock scenarios presented here, thus meeting  
72 our aims.

73

### 74 3.1. Mock Scenario 1

75 The first mock scenario involved identification of a surrogate of a chemical warfare agent  
76 (CWA) that was spiked into an alcoholic beverage intended to poison an individual. This scenario  
77 was chosen because of the attacks in recent years against multiple foreign operatives, specifically  
78 the one against former Russian agent Sergei Skripal and his daughter in the United Kingdom in  
79 2018.<sup>5</sup> The chemical chosen for this scenario was malathion ( $C_{10}H_{19}O_6PS_2$ , [DTXSID4020791](#)),  
80 intended to be used as a surrogate for Novichok nerve agents, specifically Novichok A-234  
81 ( $C_8H_{18}FN_2O_2P$ , [DTXSID60896946](#)), the chemical suspected to be used in the 2018 poisoning.<sup>24</sup>  
82 Both Novichok nerve agents and malathion are organophosphate acetylcholinesterase inhibitors,  
83 and both malathion and the chemicals in the class of Novichok nerve agents have similar structures,  
84 specifically the phosphate functional groups. Malathion is also commonly used and referred to in  
85 the literature as an acceptable surrogate for nerve agents.<sup>6,7</sup>

86 To mimic an attack, the chemical surrogate malathion was spiked into pure ethanol at 20  
87  $\mu\text{g}/\text{mL}$  concentration by Analyst 1. Un-spiked ethanol was used as the matrix blank. While pure  
88 ethanol solvent is not an ideal matrix to mimic an alcoholic beverage, the scenarios were meant to  
89 become progressively more complex, so the sample matrix for this scenario was kept relatively  
90 simple. Because the matrix of this sample was amenable for LC-MS analysis, no additional sample  
91 pre-treatment was required by Analyst 2 prior to preparing the set of serial dilutions (diluted with  
92 acetonitrile) for both the sample and matrix blank.

93

### 94 3.2. Mock Scenario 2

95 The second mock scenario involved identification of a surrogate of alprazolam  
96 ( $\text{C}_{17}\text{H}_{13}\text{ClN}_4$ , [DTXSID4022577](#)) and fentanyl ( $\text{C}_{22}\text{H}_{28}\text{N}_2\text{O}$ , [DTXSID9023049](#)) from a surface  
97 wipe sample and a carpet sample. This scenario was intended to mimic a situation in which a  
98 clandestine drug laboratory (any location where illicit drugs are being illegally manufactured or  
99 processed, like an individual's home) was discovered. In this mock scenario, an illicit drug  
100 (alprazolam, common brand name "Xanax") was being "cut" (i.e., diluted with a cheaper, more  
101 powerful drug to increase potency and stretch the supply) with fentanyl or a fentanyl analog, and  
102 on-scene investigators were tasked with determining the identity of the drugs via surface wipe and  
103 non-traditional sampling (i.e., any sampling of porous materials) done on-site.

104 Finding an appropriate surrogate of fentanyl was difficult, due to so many of the "most  
105 similar" chemicals being highly regulated by the U.S. Drug Enforcement Administration (U.S.  
106 DEA). To select a surrogate for fentanyl, chemical lists of cannabinoids from the CompTox  
107 Chemicals Dashboard were filtered based on commercial availability and not being present in the

108 list of chemicals in the NIST14 database. This was done to find a chemical that would be available  
109 for purchase and less likely able to be tentatively identified by current methods used by rapid  
110 responders. From the over 8,000 cannabinoids contained in lists on the Dashboard, seven passed  
111 the filtering criteria, and those seven were ranked via Tanimoto similarity score. The surrogate for  
112 fentanyl, finasteride ( $C_{23}H_{36}N_2O_2$ , [DTXSID3020625](#)), was selected using this approach. Another  
113 commercially available standard,  $\alpha$ -hydroxy alprazolam ( $C_{17}H_{13}ClN_4O$ , [DTXSID60190613](#)), was  
114 selected as the surrogate for alprazolam.

115 Samples were prepared by Analyst 1 in two different media, the first being a wipe of a non-  
116 porous countertop in the lab, to mimic a non-porous surface in a home such as a kitchen counter,  
117 and the second being a 3"  $\times$  3" square of carpet. Both sample media were spiked with 0.5 mL of  
118 300  $\mu$ g/mL  $\alpha$ -hydroxy alprazolam solution and 0.5 mL of 100  $\mu$ g/mL finasteride solution. The  
119 surface wipe was performed according to Willison et al., by spiking the surface of the countertop  
120 with the finasteride and  $\alpha$ -hydroxy alprazolam solution, waiting 45-60 minutes for the surface to  
121 dry, applying 3-4 mL of methanol to a wipe cloth, and then wiping the surface being sampled with  
122 firm pressure, using vertical and horizontal S-strokes.<sup>8</sup> The surface wipe was prepared as a "real"  
123 sample, intentionally conducted over an area in the lab that was covered in dust, as to be sure that  
124 some background was introduced. The carpet sample was prepared by spiking the carpet directly  
125 with the finasteride and  $\alpha$ -hydroxy alprazolam solutions. Both the surface wipe and carpet sample  
126 were extracted by Analyst 2. The surface wipe sample was extracted by adding 30 mL methanol  
127 to a 50-mL centrifuge tube containing the sample, vortexing for 1 minute, and then sonicating in  
128 an ultrasonic bath for 30 minutes. The carpet sample was extracted by placing the carpet square in  
129 a beaker, adding 30 mL methanol, and sonicating in an ultrasonic bath for 30 minutes. After  
130 sonication, the sample extracts were filtered using a 3-mL plastic syringe (BD, Franklin Lakes,

131 NJ, USA) and 25-mm syringe filter (VWR, Radnor, PA, USA) with a 0.2  $\mu\text{m}$  polypropylene  
132 membrane. Matrix blanks of both media were prepared according to the steps described above on  
133 an un-spiked dusty surface of the lab in a different location than the spiked surface wipe sample  
134 was collected and an un-spiked carpet square that was a different piece of carpet (different brand  
135 and color, same style) than the spiked carpet sample. In real-world situations where a matrix blank  
136 is not easily obtained from the location of the release, current practices by rapid responders are to  
137 use a surrogate (i.e., as similar of a sample matrix as possible from a source known to be  
138 uncontaminated). For example, in situations similar to this scenario, a carpet swatch could be  
139 obtained from a home improvement store for use as a matrix blank, even if it is not the exact  
140 brand/make as the contaminated carpet sample. The set of serial dilutions of samples and matrix  
141 blanks were prepared by diluting with acetonitrile.

142

### 143 3.3. Mock Scenario 3

144 The third mock scenario involved identification of various components of an industrial  
145 spill in surface water. Aqueous film forming foam (AFFF) mixtures are considered class B  
146 synthetic foams, designed for class B fires (i.e., those involving flammable liquids).<sup>9</sup> While AFFF  
147 is highly effective at fighting high-hazard flammable liquid fires, such as gasoline, oil, and jet fuel,  
148 these mixtures are typically created by combining foaming agents with fluorinated and non-  
149 halogenated surfactants. Notably, per- and polyfluoroalkyl substances (PFAS) are the most well-  
150 known components of AFFF, although they only comprise a small volume percentage of most  
151 AFFF mixtures (5-10%).<sup>10, 11</sup> This scenario was intended to mimic a situation in which an AFFF  
152 mixture was either intentionally or unintentionally spilled and penetrated a body of water. For this

153 scenario, a commercially available AFFF mixture was used as the industrial mix, and a sample of  
154 surface water from a nearby lake was used as the sample matrix.

155 The sample was created by Analyst 1 by diluting the AFFF mixture 100-fold in surface  
156 water, and a surface water sample taken from the same body of water but at a different location  
157 than where the sample matrix was collected (approx. 250 meters apart) was treated as the matrix  
158 blank. Because the matrix of this sample was amenable for LC-MS analysis, no additional sample  
159 pre-treatment was required by Analyst 2 prior to preparing the set of serial dilutions for both the  
160 sample and matrix blank.

161

#### 162 **4. Instrumental Analysis**

163 Liquid Chromatography (LC) – Quadrupole/Time-of-Flight (QToF) High Resolution Mass  
164 Spectrometry (HRMS) analysis was carried out using an Agilent 1290 Infinity high pressure liquid  
165 chromatography (HPLC) instrument (Agilent Technologies, Palo Alto, CA), interfaced with an  
166 Agilent 6530B QToF HRMS. Chromatographic separation was accomplished using an Eclipse  
167 Plus C8 column (2.1 × 50 mm, 3.5 μm; Agilent Technologies, Palo Alto, CA). The QToF was  
168 fitted with a dual-injection electrospray ionization (ESI) source, which operated in both negative  
169 (ESI-) and positive (ESI+) polarity (with a separate injection for each).

170 Three LC-MS methods were used during this study. The first was a 9-minute, LC-MS  
171 “rapid range finding” method, intended to perform quick chromatography for determination of  
172 appropriate sample concentration and ionization polarity (ESI+ and/or ESI-). The most dilute  
173 samples from the prepared serial dilutions were run first, along with a blank, in each ionization  
174 mode. Sample concentration was increased incrementally until an obvious difference between the



175 sample and blank was visually observed on the chromatograms, without being too concentrated as  
176 to saturate the detector. This sample dilution was then chosen as the preferred concentration for  
177 subsequent LC-MS analysis. In mock scenarios 1 and 2, only one ionization mode (ESI+) was  
178 used in the subsequent runs, based on the results of the rapid range finding method. The second  
179 method was a longer, 30-minute LC-MS method, intended to achieve greater chromatographic  
180 separation for the selected sample dilution in the chosen ionization mode(s). The third method was  
181 a 30-minute LC-MS/MS method, operating under the same LC conditions as the 30-minute LC-  
182 MS method, using data dependent acquisition (DDA) with the ion(s) of interest added to the  
183 preferred ion list (fragmenting at collision energies of 10, 20, and 40 eV). This was performed to  
184 collect MS/MS fragmentation data for selected ions that were found during the rapid range finding  
185 method and deemed potentially important for the study, as well as additional ions that the  
186 instrument selected for fragmentation based on abundance.

187 Data was collected in 2 GHz high resolution mode, collecting ions in  $m/z$  range 100–1000  
188 in both centroid and profile data formats for MS analysis, and 100-1700  $m/z$  range for the MS/MS  
189 analysis. Specifics on common instrumental parameters for all three methods can be found in Table  
190 S7, and details on the LC gradients used in each of the three runs can be found in Table S8.

191

## 192 **5. Data processing**

193 A detailed explanation of each of the five data processing approaches used in this work are  
194 described below, in sections 5.1-5.5. Specific parameters used for the various tools described  
195 below are given in Tables S9-S14 (provided in a separate Excel file).

196

## 197 5.1. Formula matching to MS-Ready Formula using MS<sup>1</sup> data

198 Molecular feature extraction and chemical formula assignment were performed according to  
199 previously published methods using Agilent Profinder v8.0 and Agilent Mass Profiler Professional  
200 (MPP) v15.0, respectively.<sup>12</sup> Molecular features (defined by an exact mass [ $m/z$ ] at a retention time  
201 [RT], associated ions, and intensity of an apparent unknown compound) were aligned and  
202 extracted using the Batch Recursive Feature Extraction Wizard in Profinder. Extracted and aligned  
203 features were saved in .CEF files which were then imported into MPP using the data import wizard,  
204 with no additional alignment performed. Specific parameters used for Profinder can be found in  
205 Table S9.

206 Chemical formulae were assigned to molecular features via the Compound Identification  
207 Wizard in MPP. This tool uses “MS-Ready” formulae for ~760 K substances contained within  
208 EPA’s Distributed Structure-Searchable Toxicity (DSSTox) Database.<sup>13</sup> These formulae are  
209 available for download online at the CompTox Chemicals Dashboard page  
210 (About/Downloads/DSSTox MS Ready Mapping File).<sup>14</sup> Procedures for generating MS-Ready  
211 formulae were described in McEachran et al., and involve desalting, desolvation, removal of  
212 stereochemistry, and neutralization.<sup>15</sup> Matching molecular features to MS-Ready formulae was  
213 based on isotope presence, abundance, and spacing. Specific parameters used for MPP can be  
214 found in Table S10. For each molecular feature, MPP assigned and output a maximum of one MS-  
215 Ready formula with the highest match score (maximum score = 100) from all potential candidate  
216 formulae, which was then deemed the top formula match from MS-Ready formula matching.

217

## 218 5.2. Manual Molecular formula prediction on MS<sup>1</sup> data

219 Another method used for determining a formula for an unknown chemical was the  
220 Molecular Formula Generator tool on Agilent MassHunter Qualitative Analysis 10.0. This tool  
221 utilizes the  $m/z$  of the selected peak, as well as the abundance and spacing of any neighboring  
222 isotopologue peaks, minimum and maximum numbers of elements to consider, maximum neutral  
223 mass allowed, minimum score per charge carrier, maximum hits per charge carrier, and minimum  
224 peak heights (both absolute and relative) when generating the list of likely predicted molecular  
225 formulae. A total match score (maximum score = 100) is assigned to each predicted formula, and  
226 the formula with the highest match score was deemed the top formula match from molecular  
227 formula prediction. Formula predictions were made after background subtracting ~0.1 min before  
228 and after the peak of interest, which has been observed to give better formula prediction than raw  
229 data. The user must specify elements to be included, as well as minimum and maximum numbers  
230 for each. The elements included and their ranges were C (3-60), H (0-240), O (0-45), N (0-50), S  
231 (0-25), Cl (0-20), P (0-25), F (0-40), and Br (0-10). Specific parameters used can be found in Table  
232 S11.

233

### 234 5.3. NTA WebApp Search by Mass using MS<sup>1</sup> data

235 For the past several years, the U.S. EPA has been developing tools to aid NTA studies in  
236 chemical identification. One of these tools is the online NTA WebApp (referred to from here on  
237 as “the WebApp”). The MS<sup>1</sup> tool of the WebApp automates the process of generating feature  
238 candidates by performing batch searches against the contents of the DSSTox database for every  
239 feature included in the results of the Compound Identification Wizard in MPP.<sup>13,16</sup> Parameters can  
240 be set on the WebApp that determine the thresholds for filtering and exclusion of individual  
241 features. In this study, the WebApp was told to search for features by mass, with a mass accuracy

242 window of  $\pm 5$  ppm. Specific parameters used can be found in Table S12. Because the WebApp  
243 was told to search by mass, every feature that was included in the MPP output file, regardless of  
244 whether a formula was assigned or not, was searched against the contents of the DSSTox database.  
245 The WebApp's MS1 tool generates a .CSV file of all features matched to unique chemicals within  
246 the DSSTox Database, and the chemical candidates listed for each feature are ordered by number  
247 of data source hits. Because it has been shown in NTA studies that the candidate within each  
248 feature's candidate list with the greatest number of data source hits is the correct identification  
249 ~80% of the time, that candidate was deemed the top chemical match for that feature from the  
250 WebApp search by mass.<sup>12, 17</sup>

251

#### 252 5.4. Matching MS<sup>2</sup> data to spectral libraries

253 Seven personal compound database and library (PCDL) files were used to match MS/MS  
254 spectra to experimental MS/MS spectra stored in a database or library: Metlin, ForTox, Pesticides,  
255 Water, Sulfas, VetDrugs, and Extractables and Leachables. Agilent MassHunter Qualitative  
256 Analysis 10.0 was used to perform these matches. Molecular features were first extracted from the  
257 MS/MS data files using the molecular feature extractor, and then compounds were identified by  
258 matching to PCDLs purchased from Agilent Technologies. Specific parameters used can be found  
259 in Table S13. A compound match (maximum forward score = 100) for a given feature was deemed  
260 as a potential candidate from matching MS/MS data to spectral libraries, and spectral matches  
261 were visually inspected to determine the best match.

262

#### 263 5.5. NTA WebApp for Matching MS<sup>2</sup> data to CFM-ID in-silico database

264 The WebApp also features an MS2 matching tool, separate from the MS1 data processing  
265 tool.<sup>16</sup> The MS2 tool matches experimental MS/MS data to a database of pre-predicted MS/MS  
266 spectra that was built by applying the Competitive Fragmentation Modeling for Metabolite  
267 Identification (CFM-ID) 2.0 algorithms to DSSTox compounds.<sup>18</sup> It has been shown that by using  
268 experimental and *in silico* libraries together, 73% of 377 unique compounds from EPA's Non-  
269 Targeted Analysis Collaborative Trial (ENTACT) were correctly identified.<sup>19</sup> In this workflow, an  
270 .MGF file of the collected MS/MS data was exported using Agilent MassHunter Qualitative  
271 Analysis. That file was then uploaded to the MS2 tool on the WebApp, with parameters for  
272 precursor and fragment mass accuracy set (the specific parameters used can be found in Table  
273 S14). The WebApp's MS2 tool generated a .CSV file containing every candidate match, with  
274 match scores (maximum score = 1) assigned by fragmentation energy. Matches were considered  
275 as possible candidates, and the candidate with the highest total match score (summed across scores  
276 from all fragmentation energies) was initially deemed the best candidate from matching MS/MS  
277 data to the CFM-ID *in silico* database.

278

## 279 5.6. General data processing guidelines

280 The results from all five data processing approaches were considered when assigning a  
281 chemical identification to any given feature in each of the mock scenarios. (It should also be  
282 reiterated that before this stage of data processing began, the initial features of interest were already  
283 prioritized and selected for further analysis by the work done during the rapid range finding  
284 method.) As a general rule, priority was given to the results from the WebApp's MS1 tool, with  
285 the remaining approaches serving to further corroborate these results. Furthermore, situational  
286 information was considered when assigning a tentative chemical identity. The conclusion of

287 chemical identity for a feature required the analyst's judgement when weighing the evidence from  
288 all five workflows. Chemical identifications were assigned a level of confidence based on the  
289 Identification Confidence scale by Schymanski et al., ranked from levels 1-5.<sup>20</sup>

290

## 291 **6. Mock scenario 2: Additional results**

292 For the first feature investigated ( $C_{17}H_{13}ClN_4O$  at 324.0783 Da), using the MFG tool (SI  
293 5.2) gave multiple possible formula matches, with  $C_{17}H_{13}ClN_4O$  being scored second highest at  
294 72.46 (the highest scored formula match was  $C_{19}H_{15}ClNO_2$  at 83.22). Mass search results of the  
295 WebApp MS1 tool (SI 5.3) showed 10 candidates with at least 5 data source hits, three of which  
296 had the same molecular formula as the one matched via MPP. The highest scoring match based on  
297 number of data source hits was  $\alpha$ -hydroxy alprazolam (n=29), with the next two hits having n=17  
298 and n=12 data source hits, but a different molecular formula ( $C_{11}H_{14}F_6O_4$  and  $C_{14}H_{16}N_2O_5S$ ,  
299 respectively). While there was no hit for the MS/MS results based on PCDL matching (SI 5.4),  
300 there were multiple candidates scored via CFM-ID predicted spectra (SI 5.5). From the original  
301 list of candidates from the WebApp MS1 results,  $\alpha$ -hydroxy alprazolam scored second highest via  
302 CFM-ID at 0.8347 (the highest scored match via CFM-ID predicted spectra was anti-  
303 Benzo(a)chrysene-11,12-diol-13,14-epoxide, with formula  $C_{22}H_{12}O_3$ , n=6 data source hits from  
304 the WebApp MS1 tool, and CFM-ID score 0.8414). Even though it ranked 2<sup>nd</sup> based on MFG and  
305 CFM-ID scoring, considering all the evidence gathered (MPP match, top ranked by data source  
306 hits, and highly ranked by MFG and CFM-ID), Analyst 2 correctly reported that the chemical  
307 identification was  $\alpha$ -hydroxy alprazolam, at a Level 2B.

308           The second feature investigated was the feature with MPP formula match  $C_{23}H_{36}N_2O_2$  (at  
309 372.2718 Da). Using the MFG tool (SI 5.2) gave multiple possible formula matches, with  
310  $C_{23}H_{36}N_2O_2$  being scored second highest at 87.90 (the highest scored formula match was  $C_{26}H_{38}$   
311 at 90.65). Results of the mass search using the WebApp MS1 tool (SI 5.3) showed 7 candidates  
312 with at least 5 data source hits, and two of these had the same molecular formula matched via MPP  
313 (the top hit, finasteride, with  $n=123$ , and the 6<sup>th</sup> hit, 2-pentadecyl-3H-benzimidazole-5-carboxylic  
314 acid, with  $n=5$ ). The highest scoring match based on number of data source hits was finasteride  
315 ( $n=123$ ), with the next two hits having much fewer number of data source hits ( $n=39$  and  $n=20$ ).  
316 While none of the spectral matches from the WebApp MS2 tool (SI 5.5) were on the list of  
317 candidates from the WebApp MS1 results, there was a PCDL match (SI 5.4) for finasteride scored  
318 at 76.80, shown in Figure S2. Based on the evidence gathered from all five data processing  
319 approaches, Analyst 2 correctly reported that the chemical identification was finasteride, at Level  
320 2A.

321           The third feature investigated was the feature with MPP formula match  $C_{11}H_{15}NO_2$  (at  
322 193.1110 Da). The MFG tool (SI 5.2) gave multiple possible formula matches, with  $C_{11}H_{15}NO_2$   
323 scoring second highest at 86.31 (the highest scored formula match was  $C_9H_{13}N_4O$  at 87.12).  
324 Results of the mass search using the WebApp MS1 tool (SI 5.3) showed many candidates ( $>10$ )  
325 with at least 20 data source hits, and the majority having the same molecular formula matched via  
326 MPP. The highest scoring match based on number of data source hits was isoprocarb ( $n=106$ ),  
327 with the next two having a similar number of data source hits (butyl 4-aminobenzoate with  $n=95$   
328 and parbenate with  $n=82$ ), and all three had the same formula that was matched via MPP  
329 ( $C_{11}H_{15}NO_2$ ). There was both PCDL (SI 5.4) and CFM-ID (SI 5.5) predicted spectra matches based  
330 on MS/MS data for feature candidates, with parbenate being the best PCDL match and second

331 highest scoring CFM-ID match at 0.6718 (out of a maximum possible score of 1). Based on the  
332 evidence gathered from all five data processing approaches, Analyst 2 reported that the chemical  
333 identification was parbenate, at Level 2A.

334

### 335 **7. Mock scenario 3: Additional results**

336 It was determined that both the 50-fold and 10-fold matrix blank/sample dilutions would  
337 need to be analyzed via the longer MS instrumental method. To capture good data for both (i)  
338 features that were present in the 10-fold diluted sample but not in the 50-fold diluted samples, and  
339 (ii) features that were saturated in the 10-fold diluted sample, it was necessary to analyze both the  
340 10-fold and 50-fold diluted samples via the general MS method and the DDA MS/MS method. A  
341 minimum threshold of sample:matrix blank ratio was then set at 10:1, and the top 3 from ESI+ and  
342 top 5 from ESI- were then chosen for further inspection. A secondary set of features of interest  
343 were also chosen, to intentionally select features that may be halogenated. Because of the recent  
344 increased interest in identifying halogenated compounds (such as PFAS compounds and other  
345 fluorinated chemicals), features that had a negative mass defect (which is common with  
346 halogenated chemicals) were also specifically sought out when analyzing the results. To not miss  
347 any potentially important halogenated compounds, features that satisfied the sample:matrix blank  
348 ratio requirement and had a negative mass defect (i.e.,  $m/z = \text{XXX}.7, \text{XXX}.8, \text{or } \text{XXX}.9$ ) were  
349 identified. The top 3 from ESI+ and top 6 from ESI- were then added to the list for further  
350 inspection, for a total of 17 features of interest for further investigation.

351 From ESI+ results, there were two features assigned at a Level 4. There were no features  
352 investigated from ESI- results that resulted in a Level 4 assignment. The chemical formulae



353 assigned were  $C_5H_5Cl_2N_3S$  and  $C_4H_3ClN_2O_3$ . From both ESI+ and ESI- results, there were a total  
354 of six features of interest that remained at a Level 5. Two of these features were observed via ESI+,  
355 and four of these features were observed via ESI-. The masses of interest observed in ESI+ were  
356  $m/z$  100.9915 and 185.1159, and the masses of interest observed in ESI- were  $m/z$  134.9874,  
357 256.9545, 306.9832, and 334.9557. For these assignments, there was either only enough  
358 supporting evidence to allow for a formula assignment, or not enough evidence to assign anything  
359 other than the  $m/z$  seen in the data.

360         Of note, there were an additional 3 features found in the ESI- results that were incorrectly  
361 assigned as unique features during the Batch Recursive Feature Extraction Wizard on Agilent  
362 Profinder. Upon further manual inspection of the chromatogram and MS spectra of these 3  
363 features, it was determined that 2 of them were isotopologues of other features and therefore were  
364 not unique features. After extracting and inspecting the MS spectrum from the regions in the  
365 chromatogram to the left and right of the third feature, it was determined that it was a spike in the  
366 background that was also incorrectly identified as its own unique feature. Of the 17 features  
367 originally selected for further analysis, after removing features that were not “real”, 14 features of  
368 interest remained.

369

## 370 **8. “Known unknowns” vs. “Unknown unknowns”**

371         It is necessary to consider that in each of the three mock scenarios presented in this work,  
372 not all chemicals of interest were truly “unknown” chemicals (i.e., never-before discovered or  
373 documented), but instead were known chemicals whose structures mimicked those unable to be  
374 identified prior to performing NTA. The chemicals used in this study were also spiked at relatively

375 high concentrations with the assumption that in real rapid response scenarios, samples can be  
376 collected near the original source, where the chemical(s) are present at much higher concentrations  
377 than the background matrix and therefore easy to identify during rapid range finding. Should this  
378 not be the case, future analysts should consider concentrating the sample extracts rather than  
379 diluting for range finding exercises. Considering the amount of chemical present and whether it is  
380 a known chemical or truly unidentified and undocumented prior to the analysis (i.e., a “known  
381 unknown” or “unknown unknown”), there are four situations in which an analyst could find  
382 themselves. These situations are detailed in Table S15. The difficulty of the resulting analysis, and  
383 therefore the time required for said analysis, increases as the concentration of chemical decreases  
384 and if it is an undocumented chemical versus one that is previously discovered.

385

## 386 **9. Hazard comparison module discussion**

### 387 9.1. Mock scenario 1

388 The hazard report for mock scenario 1 is shown in Figure S3. In this scenario, there are  
389 many human health effect concerns for malathion, and its predicted transformation product,  
390 ethanol, including oral, inhalation, and dermal acute mammalian toxicity, genotoxicity  
391 mutagenicity, single exposure neurotoxicity and systemic toxicity, skin sensitization and irritation,  
392 and eye irritation. Because the chemical in this scenario was spiked into a beverage, the main  
393 concern would be the individual who consumed the beverage, and any individuals nearby when  
394 the incident occurred, due to the inhalation toxicity concerns. Responders would address the  
395 individual who consumed the beverage, as well as likely close off the area the incident occurred  
396 from others until remediation efforts were finished. Even though the chemical and its predicted

397 transformation product have acute aquatic toxicity concerns, because this chemical was not  
398 released into a body of water, this piece of information is not relevant to this situation.

399

## 400 9.2. Mock scenario 2

401 The hazard report for mock scenario 2 is shown in Figure S4. In this scenario, there are  
402 some human health effect concerns for the three identified compounds (alpha-hydroxy alprazolam,  
403 finasteride, and parbenate) and their predicted transformation products, including oral acute  
404 mammalian toxicity and genotoxicity mutagenicity. Specifically, for one transformation product  
405 of finasteride (tert-butylamine) and one transformation product of parbenate (ethanol), there are  
406 other concerns, including inhalation and dermal acute mammalian toxicity, single exposure  
407 systemic toxicity, skin sensitization and irritation, and eye irritation. It can be assumed that the  
408 location of this scenario would already be closed to the public (since it was a raid on a “drug house”  
409 and now likely a crime scene), but individuals investigating and conducting remediation efforts  
410 would need to wear the appropriate personal protective equipment (PPE) used when at the scene  
411 of clandestine fentanyl laboratories, taking care to not orally ingest, inhale, or come into contact  
412 via skin or eyes any of the surfaces potentially impacted at the location.

413

414 **References**

- 415 1. Ruyle, B. J.; Thackray, C. P.; McCord, J. P.; Strynar, M. J.; Mauge-Lewis, K. A.; Fenton,  
416 S. E.; Sunderland, E. M., Reconstructing the Composition of Per- and Polyfluoroalkyl Substances  
417 in Contemporary Aqueous Film-Forming Foams. *Environmental Science & Technology Letters*  
418 **2021**, 8 (1), 59-65.
- 419 2. Agency, U. S. E. P. Environmental Sampling and Analytical Methods (ESAM) Program.  
420 Selected Analytical Methods for Environmental Remediation and Recovery (SAM).  
421 [https://www.epa.gov/esam/selected-analytical-methods-environmental-remediation-and-](https://www.epa.gov/esam/selected-analytical-methods-environmental-remediation-and-recovery-sam)  
422 [recovery-sam](https://www.epa.gov/esam/selected-analytical-methods-environmental-remediation-and-recovery-sam).
- 423 3. Agency, U. S. E. P., Environmental Sampling and Analytical Methods (ESAM) Program.  
424 SAM Chemical Methods Query. 2022.
- 425 4. Agency, U. S. E. P., Selected Analytical Methods for Environmental Remediation and  
426 Recovery (SAM) 2017. 2017; Vol. EPA/600/R-17/356.
- 427 5. Vale, J. A.; Marrs, T. C.; Maynard, R. L., Novichok: a murderous nerve agent attack in  
428 the UK. *Clinical Toxicology* **2018**, 56 (11), 1093-1097.
- 429 6. Noradoun, C. E.; Mekmaysy, C. S.; Hutcheson, R. M.; Cheng, I. F., Detoxification of  
430 malathion a chemical warfare agent analog using oxygen activation at room temperature and  
431 pressure. *Green Chemistry* **2005**, 7 (6), 426-430.
- 432 7. de A. Cavalcante, F. S.; Simas, B. C. A.; Kuča, K., Nerve Agents' Surrogates: Invaluable  
433 Tools for Development of Acetylcholinesterase Reactivators. *Current Organic Chemistry* **2019**,  
434 23 (14), 1539-1559.
- 435 8. Willison, S. A.; Daniel Stout, I. I.; Mysz, A.; Starr, J.; Tabor, D.; Wyrzykowska-  
436 Ceradini, B.; Nardin, J.; Morris, E.; Snyder, E. G., The impact of wipe sampling variables on

437 method performance associated with indoor pesticide misuse and highly contaminated areas.  
438 *Science of The Total Environment* **2019**, 655, 539-546.

439 9. Magrabi, S. A.; Dlugogorski, B. Z.; Jameson, G. J., A comparative study of drainage  
440 characteristics in AFFF and FFFP compressed-air fire-fighting foams. *Fire Safety Journal* **2002**,  
441 37 (1), 21-52.

442 10. Moody, C. A.; Field, J. A., Perfluorinated Surfactants and the Environmental Implications  
443 of Their Use in Fire-Fighting Foams. *Environmental Science & Technology* **2000**, 34 (18), 3864-  
444 3870.

445 11. Houtz, E. F.; Higgins, C. P.; Field, J. A.; Sedlak, D. L., Persistence of Perfluoroalkyl Acid  
446 Precursors in AFFF-Impacted Groundwater and Soil. *Environmental Science & Technology* **2013**,  
447 47 (15), 8187-8195.

448 12. Sobus, J. R.; Grossman, J. N.; Chao, A.; Singh, R.; Williams, A. J.; Grulke, C. M.;  
449 Richard, A. M.; Newton, S. R.; McEachran, A. D.; Ulrich, E. M., Using prepared mixtures of  
450 ToxCast chemicals to evaluate non-targeted analysis (NTA) method performance. *Analytical and*  
451 *Bioanalytical Chemistry* **2019**, 411 (4), 835-851.

452 13. Williams, A. J.; Grulke, C. M.; Edwards, J.; McEachran, A. D.; Mansouri, K.; Baker,  
453 N. C.; Patlewicz, G.; Shah, I.; Wambaugh, J. F.; Judson, R. S.; Richard, A. M., The CompTox  
454 Chemistry Dashboard: a community data resource for environmental chemistry. *Journal of*  
455 *Cheminformatics* **2017**, 9 (1), 61.

456 14. Agency, U. S. E. P. CompTox Chemicals Dashboard: Downloads.  
457 <https://comptox.epa.gov/dashboard/downloads>.

- 458 15. McEachran, A. D.; Mansouri, K.; Grulke, C.; Schymanski, E. L.; Ruttkies, C.; Williams,  
459 A. J., “MS-Ready” structures for non-targeted high-resolution mass spectrometry screening  
460 studies. *Journal of Cheminformatics* **2018**, *10* (1), 45.
- 461 16. Minucci, J. S., Deron; Purucker, Tom; Boyce, Matthew; Grulke, Christopher M. EPA NTA  
462 WebApp. [https://github.com/quanted/nta\\_app](https://github.com/quanted/nta_app).
- 463 17. McEachran, A. D.; Sobus, J. R.; Williams, A. J., Identifying known unknowns using the  
464 US EPA’s CompTox Chemistry Dashboard. *Analytical and Bioanalytical Chemistry* **2017**, *409*  
465 (7), 1729-1735.
- 466 18. McEachran, A. D.; Balabin, I.; Cathey, T.; Transue, T. R.; Al-Ghoul, H.; Grulke, C.;  
467 Sobus, J. R.; Williams, A. J., Linking in silico MS/MS spectra with chemistry data to improve  
468 identification of unknowns. *Scientific Data* **2019**, *6* (1), 141.
- 469 19. Chao, A.; Al-Ghoul, H.; McEachran, A. D.; Balabin, I.; Transue, T.; Cathey, T.;  
470 Grossman, J. N.; Singh, R. R.; Ulrich, E. M.; Williams, A. J.; Sobus, J. R., In silico MS/MS  
471 spectra for identifying unknowns: a critical examination using CFM-ID algorithms and ENTACT  
472 mixture samples. *Analytical and Bioanalytical Chemistry* **2020**, *412* (6), 1303-1315.
- 473 20. Schymanski, E. L.; Jeon, J.; Gulde, R.; Fenner, K.; Ruff, M.; Singer, H. P.; Hollender,  
474 J., Identifying Small Molecules via High Resolution Mass Spectrometry: Communicating  
475 Confidence. *Environmental Science & Technology* **2014**, *48* (4), 2097-2098.
- 476

477 **Table S1.** Detailed description of the five steps in the data processing workflow. Each step is  
 478 listed in column 1, with a description of each provided in column 2, and the results for the first  
 479 mock scenario (as well as the thinking/rationale behind certain steps) provided in column 3. In  
 480 the “Description” column, a general description is provided in italic font, with a more detailed  
 481 description provided in plain text beneath.

| <b>Data Processing Approach</b>             | <b>Description</b>                                                                                                                                                                                                                                                                                                                                                                                                                                                         | <b>Results from Mock Scenario 1</b>                                                                                                                                                                                           |
|---------------------------------------------|----------------------------------------------------------------------------------------------------------------------------------------------------------------------------------------------------------------------------------------------------------------------------------------------------------------------------------------------------------------------------------------------------------------------------------------------------------------------------|-------------------------------------------------------------------------------------------------------------------------------------------------------------------------------------------------------------------------------|
| (1) Feature extraction and formula matching | <i>Molecular features were extracted via Agilent Profinder v8.0 and assigned chemical formulas from compounds within DSSTox via Agilent Mass Profiler Professional (MPP) v15.0.</i><br>If a feature was matched to at least one formula, the highest scoring formula match (max=100) was assigned to that feature. The formula assignment provided for each feature was considered the “best” formula assignment, based on mass, isotope presence, abundance, and spacing. | MPP formula assignment was C <sub>10</sub> H <sub>19</sub> O <sub>6</sub> PS <sub>2</sub> (score=89.2)                                                                                                                        |
| (2) Molecular Formula Generator (MFG) tool  | <i>A list of likely molecular formulae was predicted via Agilent MassHunter Qualitative Analysis 10.0.</i><br>The formula predictions for each feature were ranked based on total match score (max=100), which is based on the <i>m/z</i> of the selected peak, isotope presence, abundance, and spacing, a min/max number of elements to consider, and min peak height thresholds. The highest scoring predicted formula was considered the “best” formula prediction.    | Top scoring MFG formula prediction was C <sub>10</sub> H <sub>19</sub> O <sub>6</sub> PS <sub>2</sub> (score=99.11)                                                                                                           |
| (3) WebApp MS1 tool                         | <i>Candidate lists for each feature output from MPP were generated by an automated search against the contents of DSSTox via the NTA WebApp’s MS1 tool.</i><br>Features for further investigation were prioritized by sorting by sample intensity after blank subtraction. Candidates were searched by mass, so multiple candidates with potentially different molecular formulae                                                                                          | Total of 49 potential candidates for the feature of interest. Top 3 candidates by data source hits were malathion (n=250), isomalathion (n=33), and becampanel (n=17). Because the formula of both malathion and isomalathion |

|                                                    |                                                                                                                                                                                                                                                                                                                                                                                                                                                                                                                                                                                                                                                                                                                                                                                                          |                                                                                                                                                                                                                                                                                                                                                                            |
|----------------------------------------------------|----------------------------------------------------------------------------------------------------------------------------------------------------------------------------------------------------------------------------------------------------------------------------------------------------------------------------------------------------------------------------------------------------------------------------------------------------------------------------------------------------------------------------------------------------------------------------------------------------------------------------------------------------------------------------------------------------------------------------------------------------------------------------------------------------------|----------------------------------------------------------------------------------------------------------------------------------------------------------------------------------------------------------------------------------------------------------------------------------------------------------------------------------------------------------------------------|
|                                                    | <p>were returned. Candidates were initially ranked by data source hits (i.e., the number of times a unique chemical appears in the various lists and libraries that compose the DSSTox database). However, consideration was also given to lesser ranked candidates if they had the same molecular formula as the matched and/or predicted formula hits from steps (1) and (2). Following this step, a top candidate from the MS1 approach was selected.</p>                                                                                                                                                                                                                                                                                                                                             | <p>were the same as the formulas from steps (1) and (2) and became panel was not, and malathion had a significantly greater number of data source hits than isomalathion, malathion was selected as the top candidate from the MS1 approach.</p>                                                                                                                           |
| <p>(4) Matching MS2 spectra to PCDL(s)</p>         | <p><i>Experimentally collected MS/MS spectra were matched against contents of seven different personal compound databases and libraries (PCDLs) via Agilent MassHunter Qualitative Analysis 10.0.</i><br/>Molecular features were first extracted from the MS/MS files using the molecular feature extractor in Qualitative Analysis. Compounds were then identified by matching to PCDLs and provided a score (max=100). The highest scoring compound was considered the “best” PCDL match.</p>                                                                                                                                                                                                                                                                                                         | <p>Matching experimentally collected MS/MS spectra to PCDL spectra yielded two compounds scored very low (25.48 and 27.32). Malathion was returned as a match from the PCDL approach, but the PCDLs did not contain a malathion mass spectrum, so it did not receive a match score.</p>                                                                                    |
| <p>(5) Matching MS2 spectra to CFM-ID database</p> | <p><i>Experimentally collected MS/MS spectra were matched to a database of pre-predicted MS/MS spectra built by applying the CFM-ID 2.0 algorithm to chemicals within DSSTox via the NTA WebApp’s MS2 tool.</i><br/>An .MGF file of the experimentally collected MS/MS data was exported using Agilent MassHunter Qualitative Analysis, and then uploaded to the WebApp’s MS2 tool. This generates a .CSV file containing every candidate match for every feature, with match scores (max=1) assigned by fragmentation energy. A total match score was generated by summing across the scores for all fragmentation energies (max=3). All matches were considered as possible candidates, and the candidate with the highest total match score was deemed the “best” candidate from CFM-ID matching.</p> | <p>Matching MS/MS spectra to a database of pre-predicted spectra yielded 55 potential matches. While scored low relative to the remaining matches, malathion was one of the potential matches. However, malathion had the greatest number of data source hits (n=250) when compared to any of the remaining highest scoring candidates on the list (n=28, n=16, etc.).</p> |
| <p>Final assignment of chemical identity</p>       | <p><i>Considering the results from all 5 data processing approaches, a final assignment is made on the chemical identity.</i></p>                                                                                                                                                                                                                                                                                                                                                                                                                                                                                                                                                                                                                                                                        | <p>Given that all MS1 approaches pointed towards the same molecular formula and the relatively large</p>                                                                                                                                                                                                                                                                   |



|  |                                                                                                                                                                                                                                                                                                                                                                                                                                                                                                                                                                                                                                                                                                                                                                                                            |                                                                                                                                                                                                                                                                                                                                                                                                                                                                                                                                                                                                                                                                                  |
|--|------------------------------------------------------------------------------------------------------------------------------------------------------------------------------------------------------------------------------------------------------------------------------------------------------------------------------------------------------------------------------------------------------------------------------------------------------------------------------------------------------------------------------------------------------------------------------------------------------------------------------------------------------------------------------------------------------------------------------------------------------------------------------------------------------------|----------------------------------------------------------------------------------------------------------------------------------------------------------------------------------------------------------------------------------------------------------------------------------------------------------------------------------------------------------------------------------------------------------------------------------------------------------------------------------------------------------------------------------------------------------------------------------------------------------------------------------------------------------------------------------|
|  | <p>Typically, the overall assignment is performed by first only considering the MS1 results (database formula matching, formula prediction, and candidates ranked by data source from the WebApp's MS1 tool). Assuming that at least one of the formulas from steps (1) and (2) agree with the top candidate from the WebApp, that is typically considered the best match from the MS1 approach.</p> <p>Then, the MS2 data is used as a way to further increase the confidence in the best match from the MS1 results. Assuming that one of the MS2 approaches from steps (4) and (5) return a match for the top ranked candidate via MS1 data (and ideally, the MS2 match is also ranked high), then that candidate is viewed as the best match and reported as the final assigned chemical identity.</p> | <p>number of data source hits when compared to the next highest ranked candidates, malathion was considered the best match from the MS1 data. While there was no spectrum of malathion to match to in the PCDL, matching to pre-predicted spectra yielded a match with malathion (though scored low). Considering all 5 points of data, the analyst reported that malathion was the chemical identification at a Level 2b on the Schymanski et al. scale, based on parent compound information (match based on the matched formula, predicted formula, measured <i>m/z</i>, and data source hits) as well as diagnostic MS/MS fragmentation (observed via the CFM-ID match).</p> |
|--|------------------------------------------------------------------------------------------------------------------------------------------------------------------------------------------------------------------------------------------------------------------------------------------------------------------------------------------------------------------------------------------------------------------------------------------------------------------------------------------------------------------------------------------------------------------------------------------------------------------------------------------------------------------------------------------------------------------------------------------------------------------------------------------------------------|----------------------------------------------------------------------------------------------------------------------------------------------------------------------------------------------------------------------------------------------------------------------------------------------------------------------------------------------------------------------------------------------------------------------------------------------------------------------------------------------------------------------------------------------------------------------------------------------------------------------------------------------------------------------------------|

482

483

484 **Table S4.** Top 10 candidate features for mock scenario 2 via MPP output (SI 4.1). Experimental  
 485 abundance (counts, sorted high to low after blank subtraction), measured accurate mass (Da), and  
 486 RT (min) are shown. The three features investigated further (based on RT < 20 min) have their  
 487 “Feature ID” listed in bold (either formula match or exact mass at RT for features not matched to  
 488 a formula).

489

| Feature ID                                                       | Abundance (counts) | Measured Accurate Mass (Da) | RT (min) |
|------------------------------------------------------------------|--------------------|-----------------------------|----------|
| C <sub>32</sub> H <sub>27</sub> N <sub>5</sub> O <sub>8</sub>    | 4.80E+07           | 609.1752                    | 21.379   |
| <b>C<sub>17</sub>H<sub>13</sub>ClN<sub>4</sub>O</b>              | 3.97E+07           | 324.0783                    | 7.485    |
| <b>C<sub>23</sub>H<sub>36</sub>N<sub>2</sub>O<sub>2</sub></b>    | 2.00E+07           | 372.2718                    | 9.058    |
| 928.2114@21.363                                                  | 5.68E+06           | 928.2114                    | 21.363   |
| C <sub>46</sub> H <sub>38</sub> F <sub>12</sub> P                | 3.95E+06           | 849.2383                    | 20.993   |
| <b>C<sub>11</sub>H<sub>15</sub>NO<sub>2</sub></b>                | 3.90E+06           | 193.111                     | 10.192   |
| C <sub>21</sub> H <sub>35</sub> N <sub>9</sub> O <sub>12</sub> S | 2.87E+06           | 637.2035                    | 21.362   |
| 833.2077@20.197                                                  | 2.48E+06           | 833.2077                    | 20.197   |
| C <sub>12</sub> HBr <sub>4</sub> Cl <sub>2</sub> NOS             | 1.76E+06           | 592.5844                    | 20.089   |
| C <sub>42</sub> H <sub>45</sub> NO <sub>23</sub>                 | 1.52E+06           | 931.2102                    | 21.366   |
| CH <sub>3</sub> NO <sub>3</sub> S <sub>2</sub>                   | 1.50E+06           | 140.9516                    | 21.827   |

490

491 **Table S5.** The 14 features further inspected during mock scenario 3, sorted by final identification  
 492 level. Details given for each feature include the polarity in which it was observed (ESI+/ESI-),  
 493 measured accurate mass (Da), RT (min), and ultimate identification level. Note that Feature ID 5  
 494 and 6 correspond to the same chemical, observed in both ESI+ and ESI- polarity.

495

| Feature ID | Polarity (ESI+/ESI-) | Measured accurate mass (Da) | RT (min) | Final Identification Level (DTXSID, for those with structure assignments)    |
|------------|----------------------|-----------------------------|----------|------------------------------------------------------------------------------|
| 1          | ESI+                 | 162.1256                    | 6.255    | Level 2 ( <a href="#">DTXSID8021519</a> )                                    |
| 2          | ESI-                 | 210.0924                    | 8.447    | Level 2 ( <a href="#">DTXSID7042433</a> )                                    |
| 3          | ESI-                 | 238.1244                    | 10.234   | Level 2 ( <a href="#">DTXSID8042428</a> )                                    |
| 4          | ESI-                 | 427.9752                    | 9.802    | Level 2 ( <a href="#">DTXSID6067331</a> )                                    |
| 5          | ESI+                 | 528.0757                    | 8.917    | Level 3 ( <a href="#">DTXSID80880983</a> or <a href="#">DTXSID10868577</a> ) |
| 6          | ESI-                 | 528.0750                    | 8.915    | Level 3 ( <a href="#">DTXSID80880983</a> or <a href="#">DTXSID10868577</a> ) |
| 7          | ESI+                 | 208.9575                    | 8.449    | Level 4                                                                      |
| 8          | ESI+                 | 323.9655                    | 6.275    | Level 4                                                                      |
| 9          | ESI+                 | 99.9837                     | 6.325    | Level 5                                                                      |
| 10         | ESI+                 | 184.1077                    | 6.255    | Level 5                                                                      |
| 11         | ESI-                 | 135.9952                    | 6.256    | Level 5                                                                      |
| 12         | ESI-                 | 257.9623                    | 6.320    | Level 5                                                                      |
| 13         | ESI-                 | 307.9910                    | 8.447    | Level 5                                                                      |
| 14         | ESI-                 | 335.9635                    | 8.447    | Level 5                                                                      |

496

497 **Table S6.** Tracer compound QC results for each mock scenario. Because mock scenario 2 was  
 498 carried out by a different individual assuming the role of Analyst 2 than for the other mock  
 499 scenarios, the specific mix of tracer compounds prepared was slightly different than for mock  
 500 scenarios 1 and 3. In all mock scenarios, for all but one tracer in mock scenario 3, the average mass  
 501 error (ppm) for each tracer compound was < 5 ppm.

502

| Compound name                                                                 | ESI Polarity | Avg. mass error (ppm) | Avg. RT (min) |
|-------------------------------------------------------------------------------|--------------|-----------------------|---------------|
| <b>Mock scenario 1</b>                                                        |              |                       |               |
| <sup>13</sup> C <sub>3</sub> -atrazine                                        | ESI+         | 2.75                  | 8.4           |
| d <sub>4</sub> -pyriproxyfen                                                  | ESI+         | 0.00                  | 13.3          |
| <b>Mock scenario 2</b>                                                        |              |                       |               |
| d <sub>3</sub> -thiamethoxam                                                  | ESI+         | 3.68                  | 4.7           |
| d <sub>4</sub> -pyriproxyfen                                                  | ESI+         | 1.05                  | 13.3          |
| <b>Mock scenario 3</b>                                                        |              |                       |               |
| <sup>13</sup> C <sub>3</sub> -atrazine                                        | ESI+         | 1.83                  | 9.0           |
| d <sub>4</sub> -pyriproxyfen                                                  | ESI+         | 2.77                  | 13.8          |
| <sup>13</sup> C <sub>4</sub> -MPFOA                                           | ESI-         | 0.72                  | 10.4          |
| <sup>13</sup> C <sub>4</sub> -MPFOS                                           | ESI-         | 0.40                  | 13.8          |
| <sup>13</sup> C <sub>6</sub> -methyl paraben                                  | ESI-         | 5.69                  | 7.0           |
| <sup>13</sup> C <sub>4</sub> , <sup>15</sup> N <sub>2</sub> -fipronil sulfone | ESI-         | 1.53                  | 12.7          |

503

504 **Table S7.** Common LC-MS instrumental parameters used in all three LC-MS methods.

505

| <b>Instrumental parameter (units)</b> | <b>Value</b> |
|---------------------------------------|--------------|
| Gas temperature (°C)                  | 300          |
| Gas flow rate (L/min)                 | 7            |
| Sheath gas temperature (°C)           | 350          |
| Sheath gas flow rate (L/min)          | 11           |
| Fragmentor voltage (V)                | 135          |
| Injection volume (µL)                 | 10.00        |
| Binary pump flow rate (mL/min)        | 0.200        |

506

507 **Table S8.** LC mobile phase gradients used in each of the LC-MS instrumental methods. Solvent  
 508 A was 0.1% (v/v) formic acid prepared in DI H<sub>2</sub>O, and solvent B was 0.1% (v/v) formic acid  
 509 prepared in acetonitrile.

510

| Time (min)                                                  | Solvent A (%) | Solvent B (%) |
|-------------------------------------------------------------|---------------|---------------|
| <b>Rapid range finding LC-MS method</b>                     |               |               |
| 1.00                                                        | 90.00         | 10.00         |
| 6.00                                                        | 0.00          | 100.00        |
| 7.00                                                        | 0.00          | 100.00        |
| 7.01                                                        | 90.00         | 10.00         |
| 9.00                                                        | 90.00         | 10.00         |
| <b>Longer, general LC-MS method and DDA LC-MS/MS method</b> |               |               |
| 2.00                                                        | 90.00         | 10.00         |
| 14.27                                                       | 5.00          | 95.00         |
| 18.75                                                       | 5.00          | 95.00         |
| 19.00                                                       | 0.00          | 100.00        |
| 20.00                                                       | 0.00          | 100.00        |
| 21.00                                                       | 90.00         | 10.00         |
| 30.00                                                       | 90.00         | 10.00         |

511

512 **Table S15.** The four situations encountered in any NTA study, based on the amount of the  
 513 “unknown” chemical of interest, and if the chemical is undocumented or not.

|                              | <b>Medium/High Concentration</b>                                                                                 | <b>Trace Concentration</b>                                                                                   |
|------------------------------|------------------------------------------------------------------------------------------------------------------|--------------------------------------------------------------------------------------------------------------|
| <b>Known Chemical</b>        | <b>Easy</b> - chemicals of interest can be identified using rapid range finding                                  | <b>Easy</b> - if information about chemical(s) of interest are available (e.g., the masses of the compounds) |
| <b>Undocumented Chemical</b> | <b>Medium Difficulty</b><br>- focus can be placed on selected features; correct identification is not guaranteed | <b>Difficult</b> – situational information is needed; chances of identification are lower                    |

514

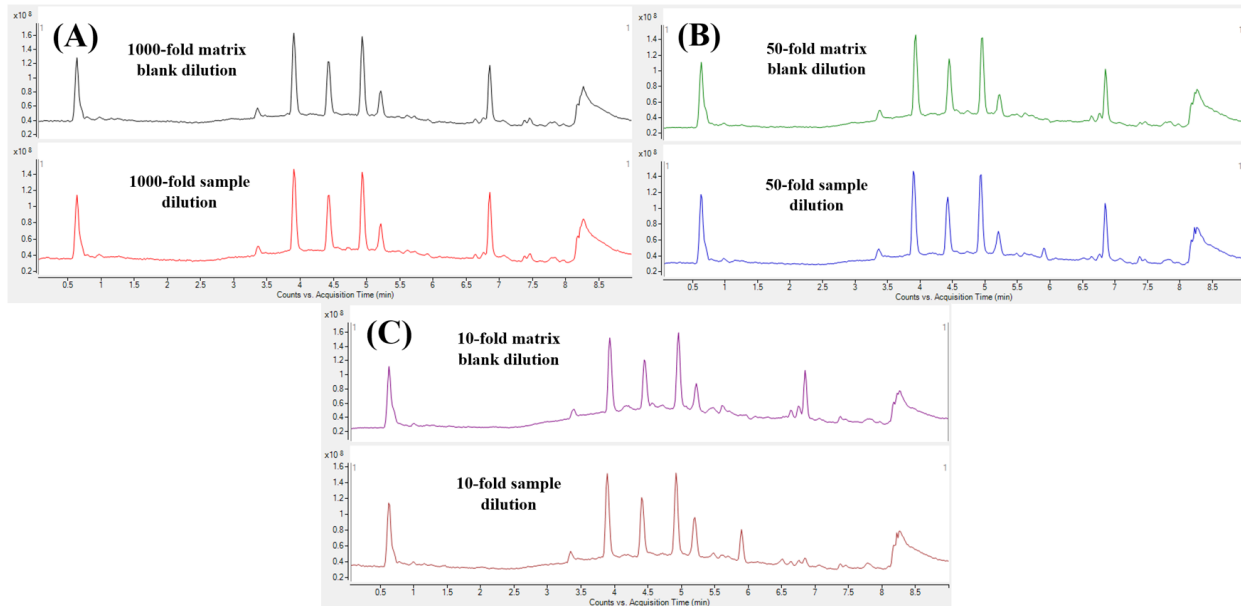

515

516 **Figure S1.** Chromatogram of the 1000-fold (A), 50-fold (B), and 10-fold (C) matrix blank (top)

517 and sample (bottom) dilutions for mock scenario 1.

518



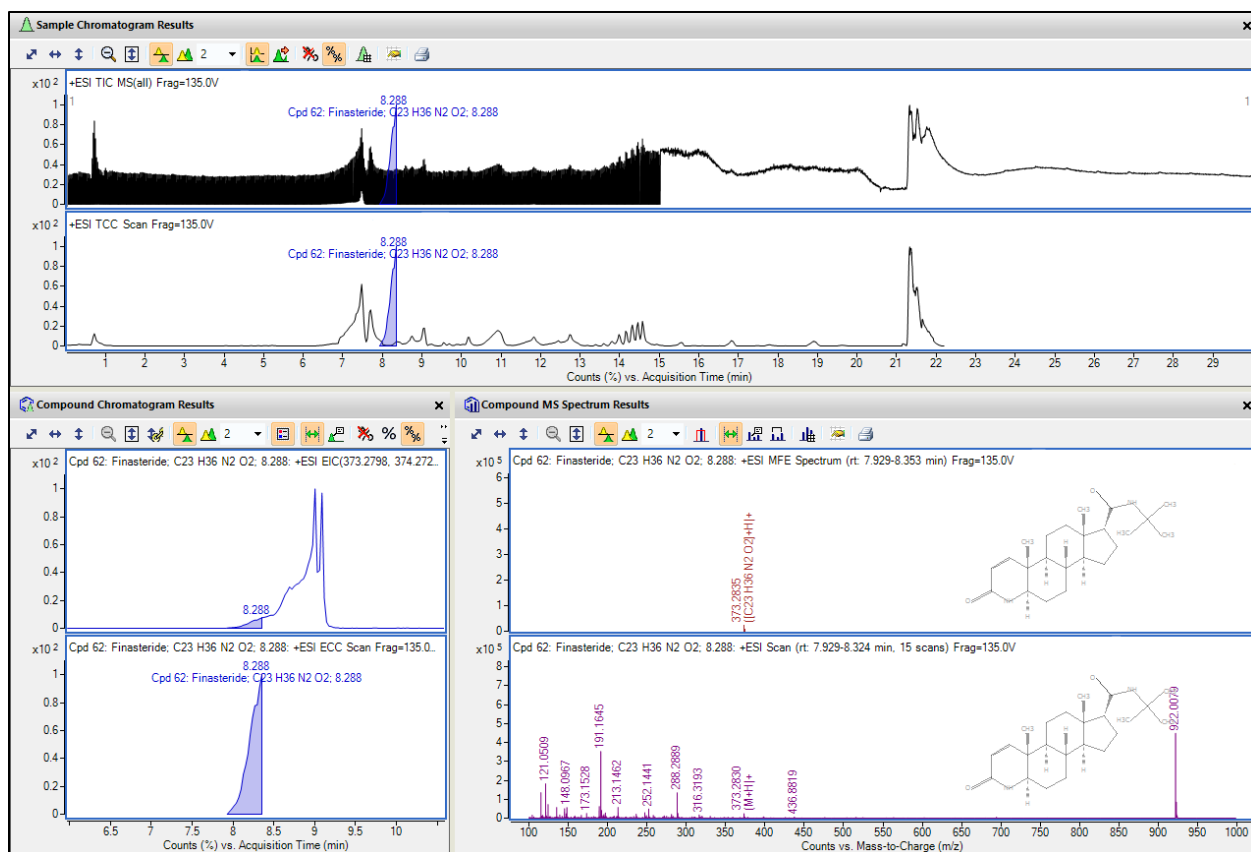

519

520 **Figure S2.** Screenshot of MS/MS compound identification results from Agilent MassHunter

521 Qualitative Analysis for mock scenario 2. The matching for the compound finasteride is shown,

522 with a PCDL match score of 76.80.

523

Chemicals: 2 Toxicity: VH - Very High H - High M - Medium L - Low I - Inconclusive N/A - Not Applicable Authority: **Authoritative** Screening QSAR Model

| CAS Name                                                                              | Human Health Effects     |            |        |                           |                 |                   |                    |                 |                |                        | Ecotoxicity |
|---------------------------------------------------------------------------------------|--------------------------|------------|--------|---------------------------|-----------------|-------------------|--------------------|-----------------|----------------|------------------------|-------------|
|                                                                                       | Acute Mammalian Toxicity |            |        | Genotoxicity Mutagenicity | Neurotoxicity   | Systemic Toxicity | Skin Sensitization | Skin Irritation | Eye Irritation | Acute Aquatic Toxicity |             |
|                                                                                       | Oral                     | Inhalation | Dermal |                           | Single Exposure | Single Exposure   |                    |                 |                |                        |             |
| 121-75-5<br>Malathion<br><small>AIGBT</small>                                         | H                        | VH         | L      | H                         | H               |                   | H                  | M               | H              | VH                     |             |
| 64-17-5<br>Ethanol<br><small>GBT</small><br><span style="color: green;">LIKELY</span> | VH                       | VH         | L      | L                         |                 | M                 | I                  | L               | H              | M                      |             |

524

525 **Figure S3.** Hazard report generated via the Hazard Comparison Module for Mock Scenario 1. The  
 526 identified chemical, malathion, and 1 generation of breakdown products for it are shown, based on  
 527 the “emergency response” hazard assessment profile.

528

Chemicals: 9 Toxicity: VH - Very High H - High M - Medium L - Low I - Inconclusive N/A - Not Applicable Authority: Authoritative Screening QSAR Model

| CAS Name                                   | Human Health Effects     |            |        |                           |                 |                 |                   |                 |                    |                 | Ecotoxicity    |                        |
|--------------------------------------------|--------------------------|------------|--------|---------------------------|-----------------|-----------------|-------------------|-----------------|--------------------|-----------------|----------------|------------------------|
|                                            | Acute Mammalian Toxicity |            |        | Genotoxicity/Mutagenicity | Neurotoxicity   |                 | Systemic Toxicity |                 | Skin Sensitization | Skin Irritation | Eye Irritation | Acute Aquatic Toxicity |
|                                            | Oral                     | Inhalation | Dermal |                           | Single Exposure | Single Exposure | Single Exposure   | Single Exposure |                    |                 |                |                        |
| 37115-43-8<br>alpha-Hydroxyalp...          | M                        |            |        | L                         |                 |                 |                   |                 |                    |                 |                | VH                     |
| No CAS<br>No Name<br>LIKELY                | M                        |            |        | L                         |                 |                 |                   |                 |                    |                 |                | H                      |
| No CAS<br>No Name<br>LIKELY                | M                        |            |        | L                         |                 |                 |                   |                 |                    |                 |                | H                      |
| 98319-26-7<br>Finasteride                  | M                        |            |        | L                         |                 |                 |                   |                 |                    |                 |                | M                      |
| 75-64-9<br>tert-Butylamine<br>LIKELY       | VH                       | H          | L      | L                         | I               | I               | I                 | VH              | H                  |                 |                | M                      |
| No CAS<br>No Name<br>LIKELY                | L                        |            |        | L                         |                 |                 |                   |                 |                    |                 |                | H                      |
| 10287-53-3<br>Parbenate                    | M                        |            |        | VH                        |                 |                 |                   |                 |                    |                 |                | L                      |
| 64-17-5<br>Ethanol<br>LIKELY               | VH                       | VH         | L      | L                         |                 |                 | M                 | I               | L                  | H               |                | M                      |
| 619-84-1<br>Benzoic acid, 4-(...<br>LIKELY | M                        |            |        | VH                        |                 |                 |                   | H               |                    |                 |                | M                      |

529

530 **Figure S4.** Hazard report generated via the Hazard Comparison Module for Mock Scenario 2. The  
 531 three chemicals identified ( $\alpha$ -hydroxy alprazolam, finasteride, and parbenate) and 1 generation of  
 532 breakdown products for them are shown, based on the “emergency response” hazard assessment  
 533 profile.
